# Supplementary material
Source: PubMed Central journal article supplement (PMC5957085)
Supplement: NIHMS965231-supplement-NIHMS965231.pdf [file NIHMS965231-supplement-NIHMS965231.pdf]

| Gene name | ETC complex | Gene ID | Reference sequences | Forward primer        | Reverse primer        |
|-----------|-------------|---------|---------------------|-----------------------|-----------------------|
| Ndufa1    | Complex I   | 54405   | NM_019443           | catccacaaattcacaacg   | caggcccttggacacatagt  |
| Ndufa10   | Complex I   | 67273   | NM_024197           | ccaaccaaggtgtagagga   | ccggaatgtgctgttaattc  |
| Ndufa11   | Complex I   | 239760  | XM_358948           | ccagatgaccccctgaacta  | agcttggcactcttgaacag  |
| Ndufa12   | Complex I   | 66414   | NM_025551           | accgatgggtcatctacacc  | gcagctgggtgattatgctgt |
| Ndufa12l  | Complex I   | 75597   | XM_001476048        | ctccaccactatggaggaa   | tgcagtaggtgaaggcaaga  |
| Ndufa13   | Complex I   | 67184   | NM_023312           | tctccaggcagagaaggac   | cccatcgtgtggtatggaac  |
| Ndufa2    | Complex I   | 17991   | NM_010885           | aggtaacagagccatgcag   | gaccacaaagcacatttcc   |
| Ndufa3    | Complex I   | 66091   | NM_025348           | catgatcaacaaggccacac  | gttctcagccagtccaagc   |
| Ndufa4    | Complex I   | 17992   | NM_010886           | cagatgtcagctgggacaga  | gtctggccctctttctca    |
| Ndufa4l2  | Complex I   | 407790  | NM_001098789        | cctgagtcaccaatgaccagt | gcaggagcagaaagatga    |
| Ndufa5    | Complex I   | 68202   | NM_026614           | ttgcttcagggtggtgaagt  | tattggcacttccactggt   |
| Ndufa6    | Complex I   | 67130   | NM_025987           | gtcacagaccccagatggt   | agaaactctttggccttgg   |
| Ndufa7    | Complex I   | 66416   | NM_023202           | gttgtgcctccctcaatcat  | gacagctcccaccttcat    |
| Ndufa8    | Complex I   | 68375   | NM_026703           | catgcagctgtttctgact   | tctctggcacaaggcagct   |
| Ndufa9    | Complex I   | 66108   | NM_025358           | caaaccggtacctgctctc   | tggactcagccaaagagt    |
| Ndufab1   | Complex I   | 70316   | NM_028177           | gatccagaaaagctccgtaa  | tcaggatattcaaacccaaa  |
| Ndufaf1   | Complex I   | 69702   | NM_027175           | ggaagggtacgagatgccca  | gggctggatcagtaaacaca  |
| Ndufb10   | Complex I   | 68342   | NM_026684           | tggagcagttcaccaaagt   | gccttcttcttccagcat    |
| Ndufb11   | Complex I   | 104130  | NM_019435           | ttttccatgtcctgtctt    | aggccattgactctcggta   |
| Ndufb2    | Complex I   | 68198   | NM_026612           | tcaccgtctggtactttc    | tgtaccgggctgaatagt    |
| Ndufb3    | Complex I   | 66495   | NM_025597           | agaaacggtgcagaagaagc  | acccccattgaaactttt    |
| Ndufb4    | Complex I   | 68194   | NM_026610           | ttcagtaaacgaccacaaa   | cctgccacagctcctaaag   |
| Ndufb5    | Complex I   | 66046   | NM_025316           | accctggctatcctccagat  | cctttcagggttggaaat    |
| Ndufb6    | Complex I   | 230075  | NM_001033305        | tcgctgtttctcatgtctt   | tctcagctccagaattgatca |
| Ndufb7    | Complex I   | 66916   | NM_025843           | ctgaagtgcaagcgagacag  | cgctcagctcaaacctctt   |
| Ndufb8    | Complex I   | 67264   | NM_026061           | ggccgccaagaagtataaca  | tgataccaggtaccctctc   |
| Ndufb9    | Complex I   | 66218   | NM_023172           | gtggaagaagctgaggatgg  | gcaagtcaccttccctctg   |
| Ndufc1    | Complex I   | 66377   | NM_025523           | cctcggtttcatgtggatt   | tccagaggaaggactgtgat  |
| Ndufc2    | Complex I   | 68197   | NM_024220           | tttgtatgctgtgaaggacca | tgaaaacttcaacgactgg   |
| Ndufs1    | Complex I   | 227197  | NM_145518           | cttcagggagcattcattc   | gttgacacagctgcaagaa   |
| Ndufs2    | Complex I   | 226646  | NM_153064           | cacatgttgcagatgtcgt   | ttgtctcccacagacacag   |
| Ndufs3    | Complex I   | 68349   | NM_026688           | ttatggcttcgagggacatc  | attctgtgcagctccact    |
| Ndufs4    | Complex I   | 17993   | NM_010887           | ttctgacctcagtgccaaa   | tccaagaaaagtttgacca   |
| Ndufs5    | Complex I   | 595136  | NM_001030274        | gcgaaaaaggagtgcagat   | tgaggtggaggggtgtatt   |
| Ndufs6    | Complex I   | 407785  | NM_010888           | cacaacagcctgtgaacgag  | catgtccccgttttgttc    |
| Ndufs7    | Complex I   | 75406   | NM_029272           | ggcgtgggtactaccacta   | cagctgcaagatgccataaa  |
| Ndufs8    | Complex I   | 225887  | NM_144870           | cgacacgctatgacatcgac  | cagcaactcctcgtgtgtct  |
| Ndufv1    | Complex I   | 17995   | NM_133666           | gactccctgtggagatcag   | aatcgttccatccgatct    |
| Ndufv2    | Complex I   | 72900   | NM_028388           | ctggaaaagtccaacca     | caagttaaaggcctgttgc   |
| Ndufv3    | Complex I   | 78330   | NM_030087           | gacagcaaaagccaggtc    | cgcttcttctctgtctg     |
| Sdha      | Complex II  | 66945   | NM_023281           | acatgcagaagtcgatgcag  | cattccccctgtcgaatgct  |
| Sdhb      | Complex II  | 67680   | NM_023374           | agctactgttggaaacggaga | gcagcggtagacagagaagg  |
| Sdhc      | Complex II  | 66052   | NM_025321           | cctttgggaaccacagctaa  | acggacagtcacataggaag  |
| Sdhd      | Complex II  | 66925   | NM_025848           | ggfcagaccccgttatgtgt  | gagagatgcagccttggaac  |
| Cyb5a     | Complex III | 109672  | NM_025797           | ggcagtcagacaaggatgt   | tttccaccagatgctctt    |
| Cyb5b     | Complex III | 66427   | NM_025558           | gtcacctactaccggctgga  | gcttgtccagcagaacctc   |
| Cyb5r1    | Complex III | 72017   | NM_028057           | ccttacacctctgaccag    | cccaatctcagctatcca    |
| Cyb5r2    | Complex III | 320635  | NM_177216           | aatgaccaggaacctttt    | agctgtagcatggcgtaat   |
| Cyb5r3    | Complex III | 109754  | NM_029787           | acatcctggccttctctatt  | ttgaccaccaagtcacaaa   |
| Cyb5r4    | Complex III | 266690  | NM_024195           | ggcctcagtttccaageta   | ggagctcatctggagtgcaa  |
| Cyc1      | Complex III | 66445   | NM_025567           | gcatacagaaccagagcatga | ccagcttctgactctcagg   |
| Rieske    | Complex III | 66694   | NM_025710           | ccactgttctgagatgtaa   | aaaacggacagaagcagaa   |
| Ucrc      | Complex III | 66152   | NM_197979           | gcgatctcagcacaataa    | actccagcacaacagctgac  |
| Uqcc      | Complex III | 226849  | NM_018888           | agaagccatgggattcactg  | tgaatgtatgggcatctga   |
| Uqcr      | Complex III | 66594   | NM_025650           | gccttatcaaacggcaagt   | ctccaggtgcagcttctc    |
| Uqcrb     | Complex III | 432822  | XM_484346           | taagagagccctggactga   | gcccactctctctctctt    |
| Uqcre1    | Complex III | 22273   | NM_025407           | aagcttggcagagtcca     | ggtacataggcgcattcact  |
| Uqcre2    | Complex III | 67003   | NM_025899           | ccaccttaccgtcttca     | actctgcgagaaaaggcgtg  |
| Uqcrh     | Complex III | 66576   | NM_025641           | tactctggttgcgttgtt    | gggggtccactagtcttcc   |
| Uqcrq     | Complex III | 22272   | NM_025352           | cgcttccaagctatttc     | gccccatgtgatagatcaggt |

|              |            |           |              |                       |                       |
|--------------|------------|-----------|--------------|-----------------------|-----------------------|
| Cox10        | Complex IV | 70383     | NM_178379    | gatgatctgcctggcatttt  | gaagcaggaccagtcgaaag  |
| Cox11        | Complex IV | 69802     | NM_199008    | gagaacatggctgctgcaaa  | atgccagtgcagctctctct  |
| Cox15        | Complex IV | 226139    | NM_144874    | cagctctgtggacctcctctg | cacaaaagccctcgagagag  |
| Cox4i1       | Complex IV | 12857     | NM_009941    | agtggttgaagagtgaaagac | gcggtacaactgaacttctc  |
| Cox4i2       | Complex IV | 84682     | NM_053091    | gttgactgctagcccagcgc  | ccggtacaagccacttctc   |
| Cox5b        | Complex IV | 12859     | NM_009942    | cagaaggactggaccata    | ttcacagatgcagcccacta  |
| Cox6a1       | Complex IV | 12861     | NM_007748    | gagggttcagctcggatgt   | gggctctctcgtctcttc    |
| Cox6a2       | Complex IV | 12862     | NM_009943    | ttctagcctcccttgaca    | gaagagccagcacaaggct   |
| Cox6b1       | Complex IV | 110323    | NM_025628    | ccccaaccagaaccagacta  | gactgtacacacccggta    |
| Cox6c        | Complex IV | 12864     | NM_053071    | cacagatgcgtggtctctg   | gcatacgcctctctctgg    |
| Cox7a1       | Complex IV | 12865     | NM_009944    | ccgacaatgacctcccagta  | ccagcccaagcagatataagc |
| Cox7a2       | Complex IV | 12866     | NM_009945    | aagatgttgcggaatctgct  | gcacccattatctctctga   |
| Cox7b        | Complex IV | 66142     | NM_025379    | ctaagccgtctccaagtctg  | aagatggctccactgctaa   |
| Cox7c        | Complex IV | 12867     | NM_007749    | ccagagatccggagggtcca  | ggctcatatagccagcaacc  |
| Cox8a        | Complex IV | 12868     | NM_007750    | atgtctgtcctgacccact   | gaagtgagcccaatggtgat  |
| Atp5a1       | Complex V  | 11946     | NM_007505    | ttatcccccaaatctctgtg  | gcaatcagatgtttcccagt  |
| Atp5b        | Complex V  | 11947     | NM_016774    | gaggtcttcacgggtcacat  | atgggtcccaccatgtagaa  |
| Atp5c1       | Complex V  | 11949     | NM_001112738 | acaatctggccaacctcctc  | gtcgggtgaaagcgaaggt   |
| Atp5d        | Complex V  | 66043     | NM_025313    | aggggttcacacagaagacg  | agcatgtccaggtctacagc  |
| Atp5e        | Complex V  | 67126     | NM_025983    | ccggtttgaggctactctga  | cctcactgctttgacacaga  |
| Atp5f1       | Complex V  | 11950     | NM_009725    | atcgctgactaccacatc    | ttgcaatggtctctctttc   |
| Atp5g1       | Complex V  | 11951     | NM_007506    | aaaaatcgagaccaccaagg  | caggaaaggccttagatgg   |
| Atp5g2       | Complex V  | 67942     | NM_026468    | tgggactgttttgggagtc   | tgagaaaggccaccattagg  |
| Atp5g3       | Complex V  | 228033    | NM_175015    | cccagaatggtgtgtgtcag  | caccagaaccagcaactcct  |
| Atp5h        | Complex V  | 71679     | NM_027862    | gaaaccacctgcgattgact  | gtccaccaggctgtgtatt   |
| Atp5i        | Complex V  | 27425     | NM_013795    | actaccgaaggttgagctg   | aaccattcagcacagctcc   |
| Atp5j        | Complex V  | 11957     | NM_016755    | gtcctcggctcagctctc    | agatgcctgtcgtttgatt   |
| Atp5j2       | Complex V  | 57423     | NM_020582    | tggataatgatcgggattt   | ctgccaggaccatgctaac   |
| Atp5k        | Complex V  | 11958     | NM_007507    | cggttcaggtctctccactc  | ctcttttctccgtgcta     |
| Atp5o        | Complex V  | 28080     | NM_138597    | ctatgcaaccgccctgtact  | gtcgtgtgatgtaggatt    |
| Atp5s        | Complex V  | 68055     | NM_026536    | ccatggtcatgtgactccag  | cacaccgaagtagccactca  |
| Atpaf1       | Complex V  | 230649    | NM_181040    | agacaaaactcggaggaaa   | aaatgttggcaggactgag   |
| Atpaf2       | Complex V  | 246782    | NM_145427    | ggtgcttaccagccactgt   | gaagcacagctgttcaca    |
| LOC100040708 | Complex V  | 100040708 | NM_001111335 | agaccatggccaagttcctc  | aaccagctcaacctgtgtg   |
| Ucp1         | UCP        | 22227     | NM_009463    | ggcctctacgactcagtc    | ccttcacgacctgttaggc   |
| Ucp2         | UCP        | 22228     | NM_011671    | ctcaagcagcctccagaac   | acatctgtggccttgaacc   |
| Ucp3         | UCP        | 22229     | NM_009464    | cgtgtgatgtgtaagacc    | aaaggagggcacaatcctt   |
| Ucp4         | UCP        | 74011     | NM_028711    | aggtcggatggtcacctatg  | gtcagtggtgtgctaaaa    |
| Ucp5         | UCP        | 20523     | NM_011398    | ggaatgctgggagacacaat  | gtcccactattgcccttga   |
| Sco1         | Chaperone  | 52892     | NM_001040026 | ccaccctgttcagagcgtt   | ttccttgaccttagcgcagt  |
| Sco2         | Chaperone  | 100126824 | NM_001111288 | ctgctcaaccctgatggtct  | acaggcctagcgaataggt   |
| Surf1        | Chaperone  | 20930     | NM_013677    | acttgggagtcaccatctg   | gggcttctgtttctgtga    |
| Actb         | Reference  | 11461     | NM_007393    | ctaaggccaaccgtgaaaag  | ccatcacaatgctgtgtga   |
| Hprt         | Reference  | 15452     | NM_013556    | gccccaaaatggttaaggtt  | caaggcctatccaacaaca   |
| Ppia         | Reference  | 268373    | NM_008907    | agcatacaggtcctggatc   | ttcacctcccaagaccac    |
| Lonp1        | Control    | 74132     | NM_028782    | acacatccaaggaggtgctc  | gagggttaaggcgatgata   |
| Vegfa        | Control    | 22339     | NM_001025257 | caggctctgtaacgatgaa   | gcattcacatctgctgtct   |
| Bnip3        | Control    | 12176     | NM_009760    | gcttggggtatcattgga    | ccaaggacctgctagctct   |
| Gapdh        | Control    | 14433     | NM_008084    | aacttggcattgtggaagg   | ggatgcagggatgatgttct  |
| Slc2a1       | Control    | 20525     | NM_011400    | agcagctgtcgggtatcaat  | acagcgaccaccagtgaa    |

**Gene Name** = scientifically recognized gene name abbreviation

**ETC Complex** = ETC complex (I, II, III, IV, V) of which gene is included

(UCP = uncoupled protein gene; Chaperone = chaperone gene; Reference = housekeeping gene;

Control = stress responsive/HIF1 $\alpha$  responsive gene)

**Gene ID** = Entrez Gene identification number

**Reference Sequence** = NCBI reference sequence code

**Forward Primer** = primer designed to amplify sense (top) strand of template

**Reverse Primer** = primer designed to amplify antisense (bottom) strand of template

**Amp Size** = size of amplicon created by listed primers

**Amp size**

---

124  
139  
140  
139  
134  
129  
125  
121  
122  
122  
138  
139  
134  
140  
125  
116  
133  
121  
119  
123  
137  
116  
124  
136  
119  
123  
119  
137  
129  
119  
140  
119  
126  
137  
118  
126  
128  
131  
126  
127

---

128  
138  
122  
118

---

138  
140  
135  
116  
127  
120  
130  
117  
129  
140  
136  
138  
138  
136  
123  
115

---

117  
133  
136  
173  
143  
117  
115  
132  
126  
124  
116  
127  
119  
118  
137

---

130  
125  
139  
120  
134  
130  
129  
137  
126  
133  
138  
138  
130  
137  
138  
124  
130  
137  
123

---

136  
140  
131  
139  
130

---

121  
139  
137

---

126  
120  
127

---

132  
140  
140  
132  
132

---
